# Supplementary material for: Self-assembled boron nitride nanosheet-based aerogels as support frameworks for efficient thermal energy storage phase change materials
Source: Royal Society of Chemistry journal article supplement (doi:10.1039/d3ra05389j), 2023-01-01
Supplement: d3ra05389j1.pdf [file d3ra05389j1.pdf]

## Self-assembled boron nitride nanosheets-based aerogels as support frameworks for efficient thermal energy storage phase change materials

Lanshu Xu<sup>1</sup>, Yujie Ding<sup>1</sup>, Laishun Wang<sup>2\*</sup>

<sup>1</sup> Zhuhai Fudan Innovation Institution, Zhuhai, 518057, China

<sup>2</sup> Sino-French Institute for Nuclear Energy and Technology, Sun Yat-sen University, Zhuhai, 519080, China

\*Corresponding author: Laishun Wang (E-mail: wanglaish@mail.sysu.edu.cn)

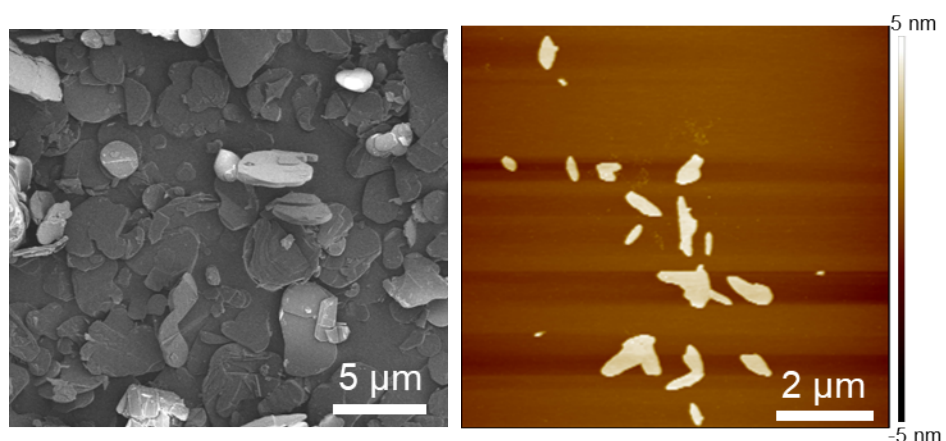

**Fig. S1** SEM image of h-BN and AFM image of BNNSs.

The rigid and thick bulk h-BN powders were transformed into BNNSs with few layers.

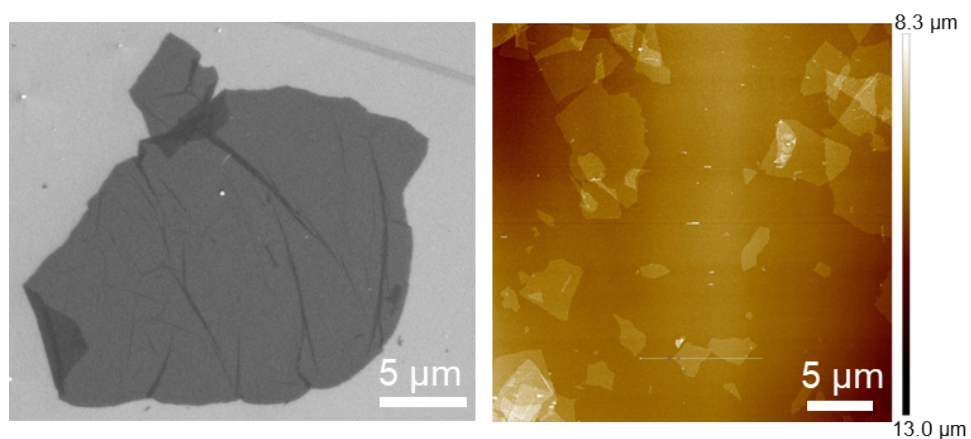

**Fig. S2** TEM and AFM images of GO nanosheets.

The majority of graphene is monolayer with lateral size of 5-8  $\mu\text{m}$ .

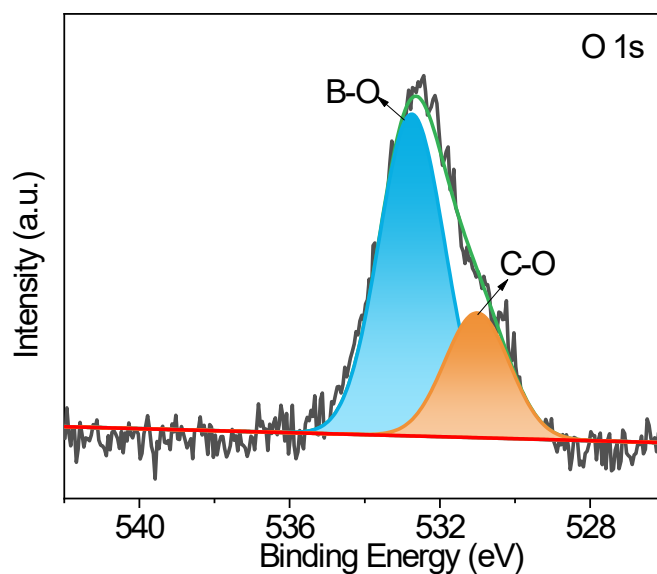

**Fig. S3** High-resolution deconvoluted XPS spectrum of O 1s of BG-85 aerogel.

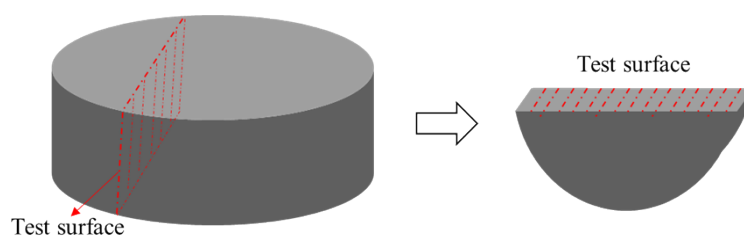

**Fig. S4** Illustration of test surface for XRD.

| Samples | $T_m/^\circ\text{C}$ | $T_c/^\circ\text{C}$ | $\Delta H_m/\text{J/g}$ | $\Delta H_c/\text{J/g}$ | $T_{\text{monset}}/^\circ\text{C}$ | $T_{\text{mend}}/^\circ\text{C}$ | $T_{\text{conset}}/^\circ\text{C}$ | $T_{\text{cend}}/^\circ\text{C}$ |
|---------|----------------------|----------------------|-------------------------|-------------------------|------------------------------------|----------------------------------|------------------------------------|----------------------------------|
|---------|----------------------|----------------------|-------------------------|-------------------------|------------------------------------|----------------------------------|------------------------------------|----------------------------------|

|        |      |      |       |       |      |      |      |      |
|--------|------|------|-------|-------|------|------|------|------|
| PEG    | 65.7 | 40.4 | 192.3 | 184.8 | 49.7 | 75.7 | 47.5 | 27.3 |
| BGP-80 | 66.5 | 43.0 | 169.6 | 149.1 | 54.1 | 73.8 | 49.3 | 33.2 |
| BGP-85 | 66.5 | 43.1 | 187.2 | 172   | 55.8 | 74.0 | 48.8 | 32.9 |
| BGP-90 | 66.5 | 45.6 | 176.6 | 158.2 | 55.1 | 73.6 | 50.5 | 35.6 |
| BGP-95 | 66.7 | 43.5 | 181.5 | 159.6 | 51.6 | 76.6 | 49.8 | 30.2 |

**Table S1** Specific parameters of phase change enthalpies and characteristic temperatures.

Note:  $T_m$ : Melting point temperature,  $T_c$ : Crystallisation temperature,  $\Delta H_m$ : Melting enthalpy,  $\Delta H_c$ : Crystallisation enthalpy,  $T_{monset}$ : Melting start point temperature,  $T_{mend}$ : Melting end point temperature,  $T_{conset}$ : Crystallisation start point temperature and  $T_{cend}$ : Crystallisation end point temperature.

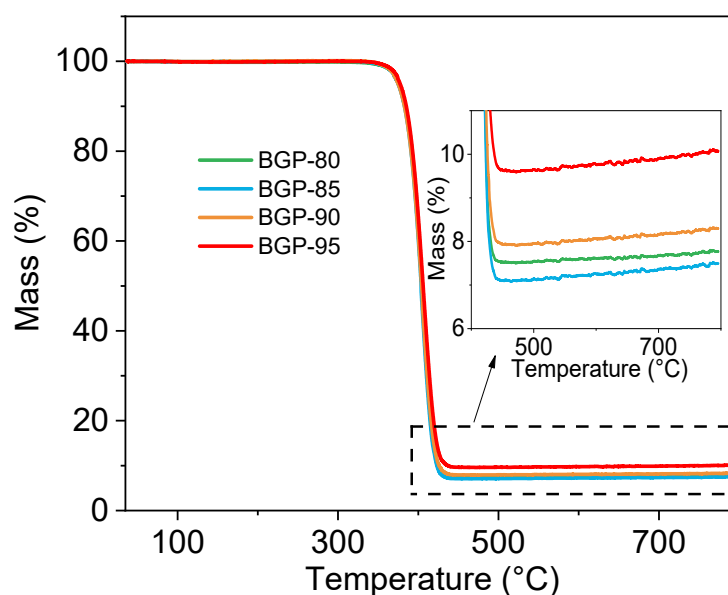

**Fig. S5** Thermogravimetric analysis (TGA) of BGP composite PCMs.
